# Supplementary material
Source: MDPI journal article supplement (https://www.mdpi.com/2073-4395/10/11/1806)

Figure S1: A representative picture of the disease severity group 2. A plant of Erice lemon.

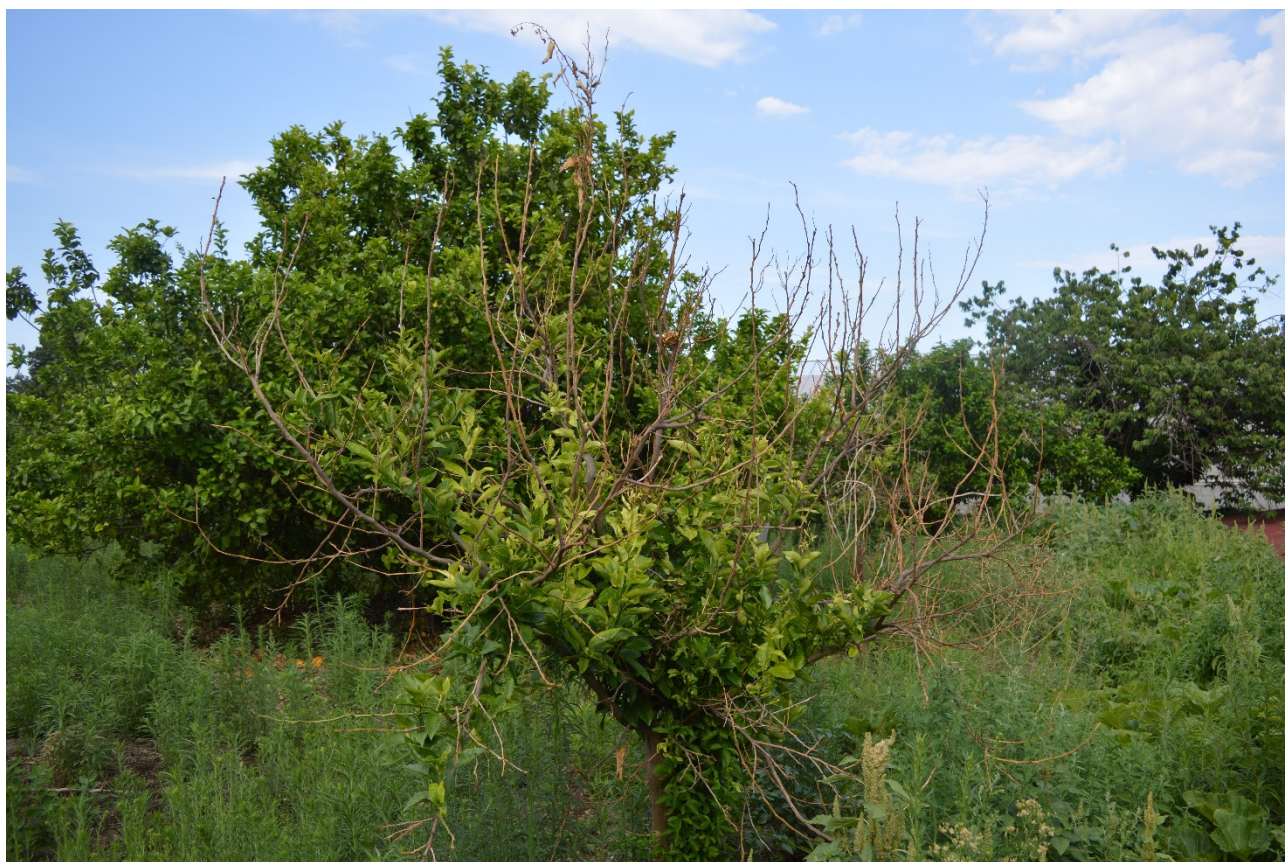

Figure S2: A representative picture of the disease severity group 3. A plant of Ovale di Sorrento lemon.

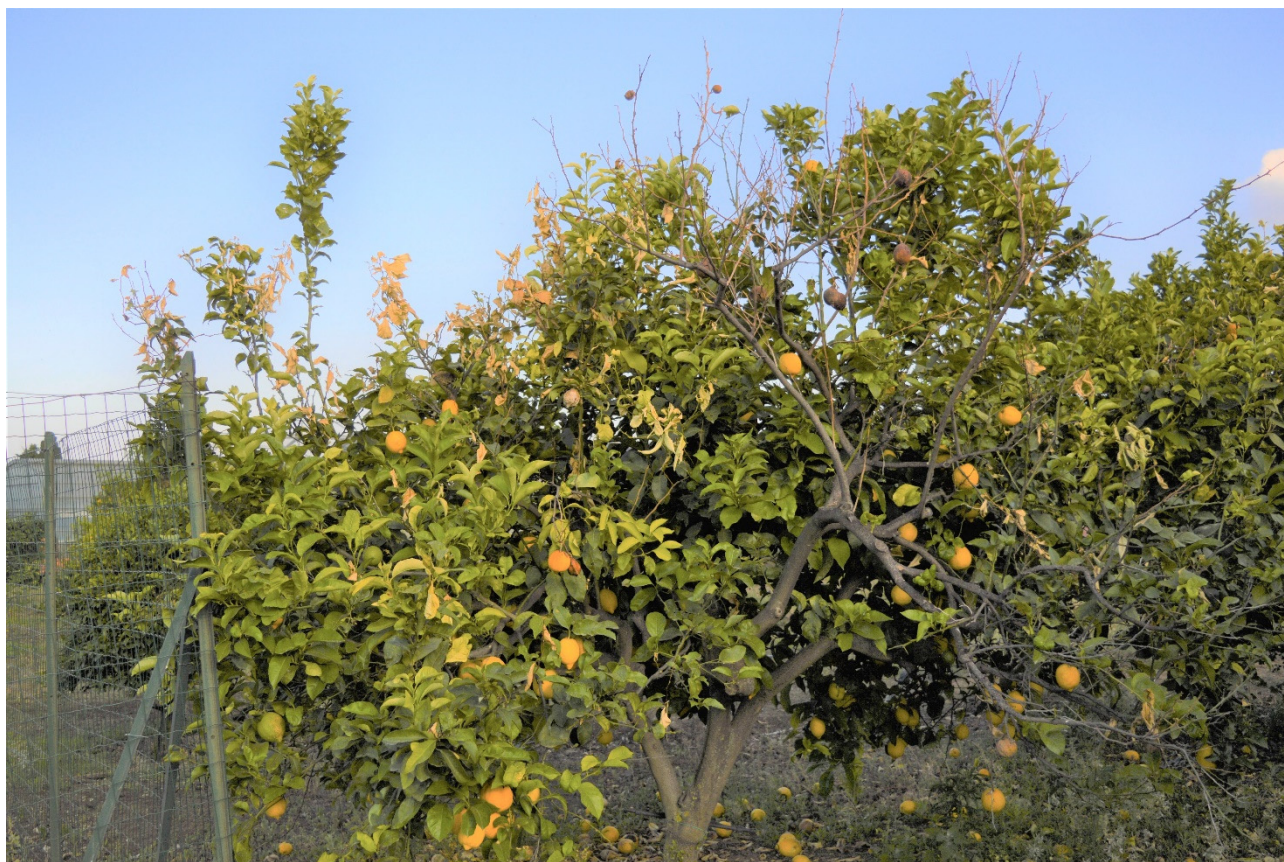



Figure S3: A representative picture of the disease severity group 4. A plant of Continella M84 lemon.

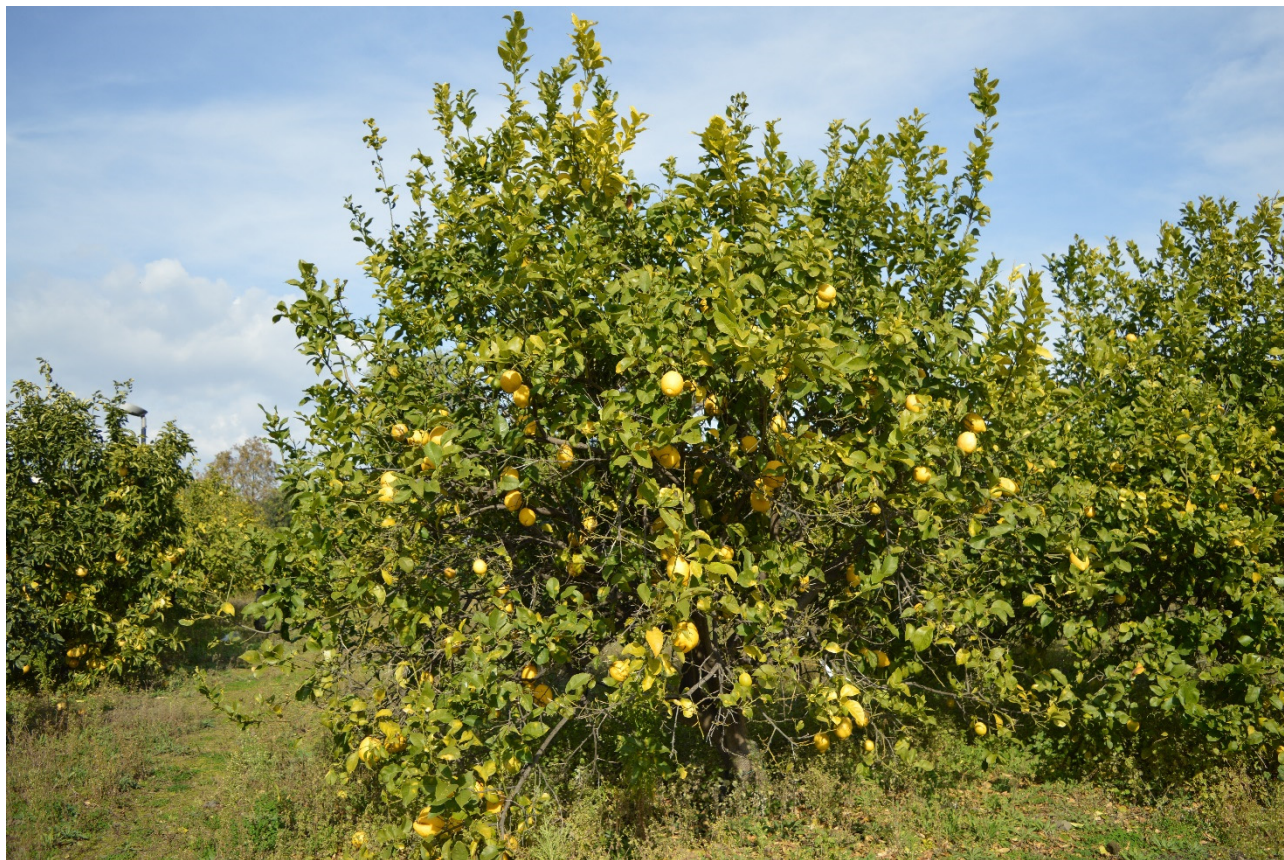



Figure S4: A representative picture of the disease severity group 5. A plant of Segesta lemon.

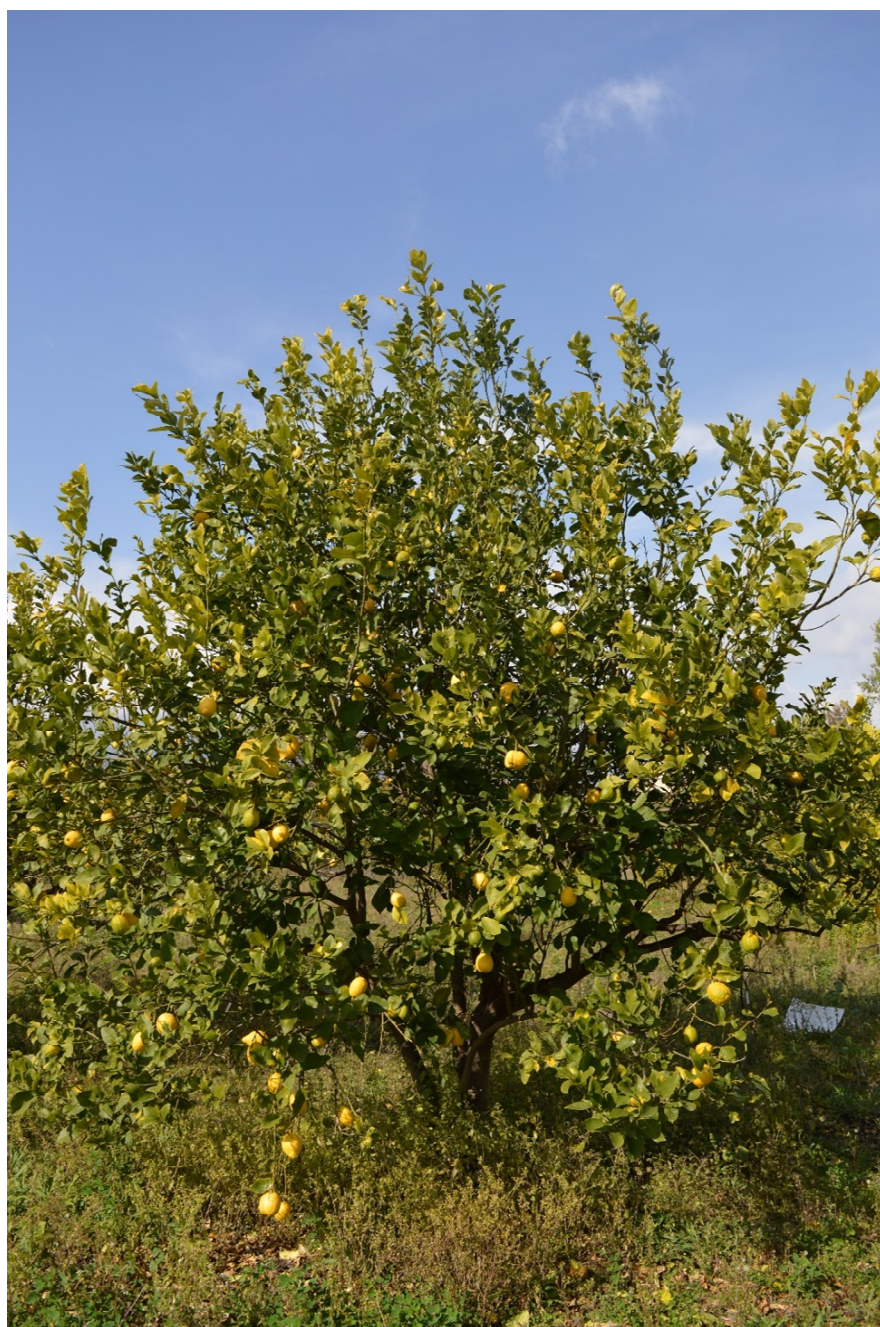



Figure S5: A representative picture of the disease severity group 6. A plant of Cardinale.

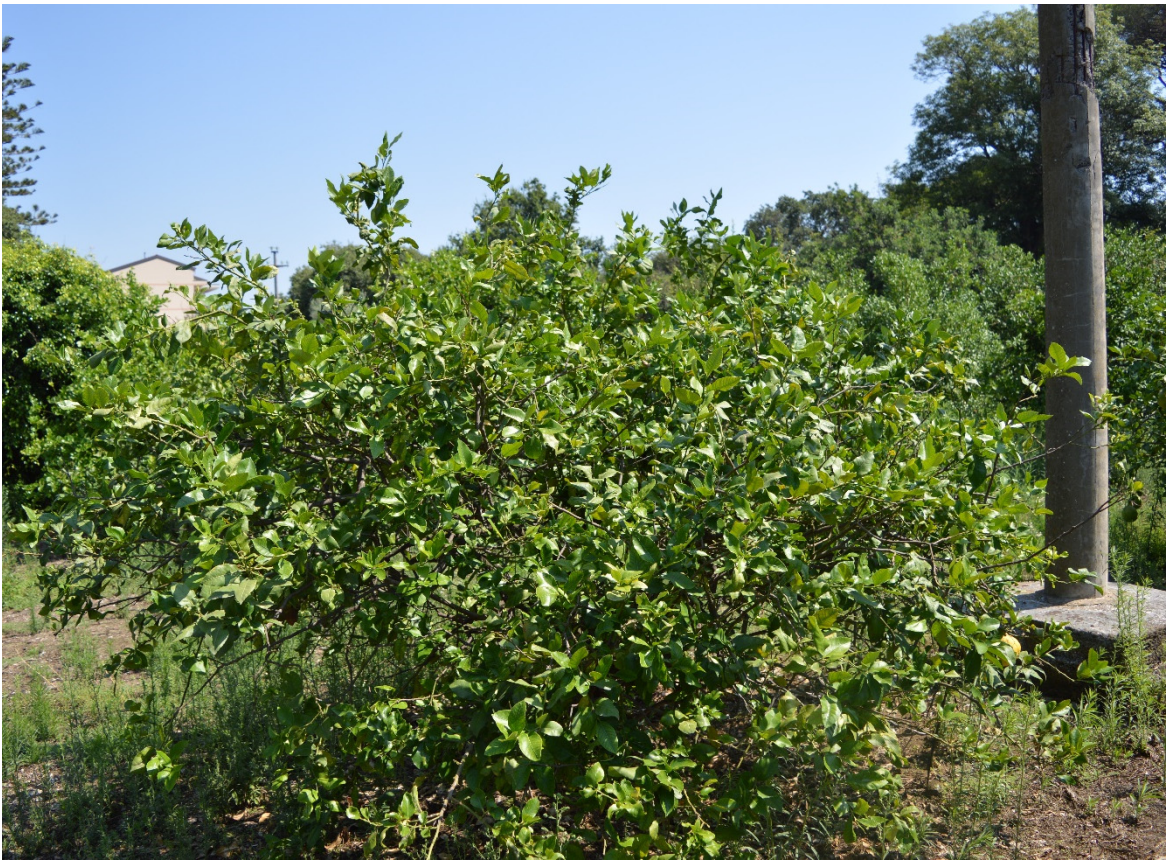

Figure S6: A representative picture of the disease severity group 7. A plant of Doppio lentini tetraploid lemon.

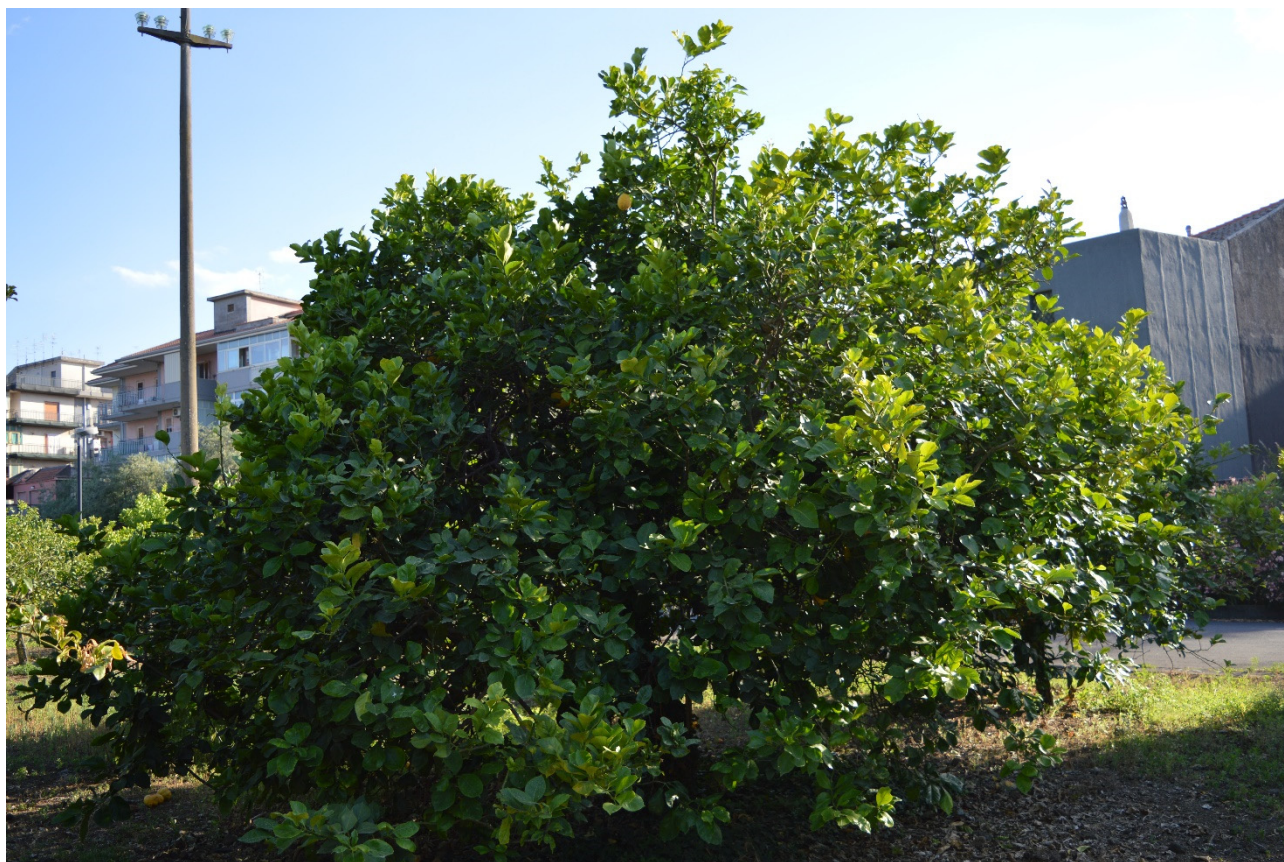

Supplement: s1 [file s1]
